# Supplementary material for: Synthesis of the spiroacetal-containing anti-Helicobacter pylori agents CJ-12,954 and CJ-13,014
Source: Royal Society of Chemistry journal article supplement (doi:10.1039/b612757f), 2006-01-01
Supplement: b612757f.pdf [file b612757f.pdf]

## ELECTRONIC SUPPLEMENTARY INFORMATION (ESI)

### Synthesis of the Spiroacetal-Containing Anti-*Helicobacter Pylori* Agents CJ-12,954 and CJ-13,014

Margaret A. Brimble\* and Christina J. Bryant

Department of Chemistry, The University of Auckland, 23 Symonds St., Auckland, New Zealand.

E-mail: [m.brimble@auckland.ac.nz](mailto:m.brimble@auckland.ac.nz); Fax: +64 9 3737599; tel; +64 9 3737599 ext 88259

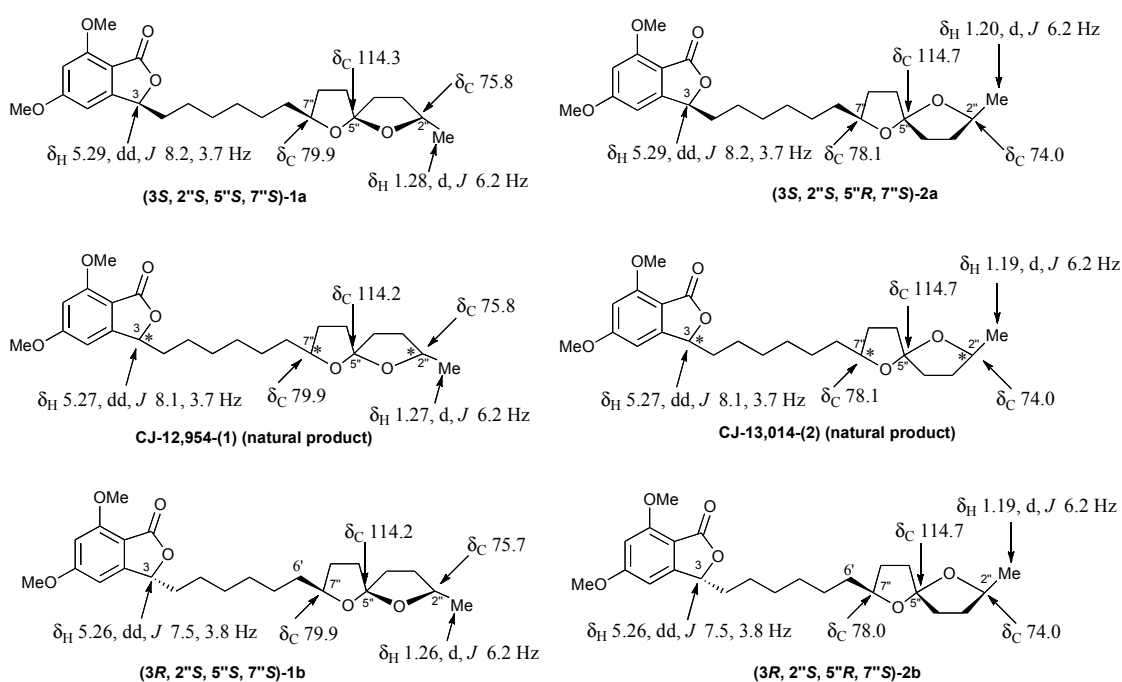

Figure 2

### Experimental Details

**(3'E, 3S, 2''S, 5''S, 7''S)- (3'E, 3S, 2''S, 5''R, 7''S)- (3'Z, 3S, 2''S, 5''S, 7''S)- (3'Z, 3S, 2''S, 5''R, 7''S)- 5,7-Dimethoxy-3-[6'-(2''-methyl-1'',6''dioxaspiro[4.4]non-7''-yl)hex-3'-en-1'-yl]-3H-isobenzofuran-1-one [precursors to (1a) and (2a)]**

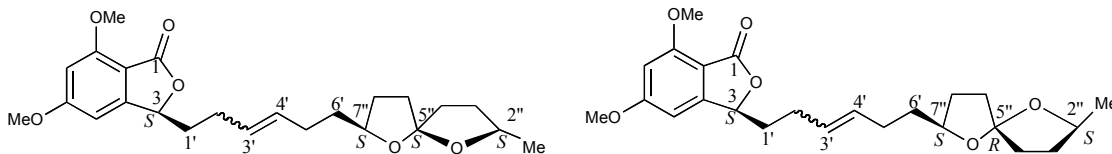

To a solution of sulfones **6** and **7** (30 mg, 0.08 mmol, 1:1) in tetrahydrofuran (1 mL), under an atmosphere of nitrogen at  $-78\text{ }^{\circ}\text{C}$ , was added potassium hexamethyldisilazide (0.20 mL, 0.5M in toluene, 0.10 mmol) dropwise. The mixture was stirred for 20 min at  $-78\text{ }^{\circ}\text{C}$  then a solution of aldehyde **5a** (19 mg, 0.08 mmol) in tetrahydrofuran (1 mL) added. The mixture was stirred for 1.5 h at  $-78\text{ }^{\circ}\text{C}$  then 1 h at rt. Diethyl ether (10 mL) was added followed by saturated aqueous sodium chloride (10 mL). The layers were separated and the aqueous layer washed with diethyl ether (2 x 10 mL). The combined organic layers were dried over potassium carbonate and the solvent removed under reduced pressure. The crude oil was purified by flash column chromatography using hexane-diethyl ether (1:1) as eluent to afford the *title compounds* (28 mg, 84%) as a colourless oil and as a 1:1 mixture of diastereomers;  $\nu_{\text{max}}$  (film)/ $\text{cm}^{-1}$  2971, 2248, 2091, 1743, 1614, 1458, 1337, 1217, 1158, 1028, 910, 837, 730;  $\delta_{\text{H}}$  (300 MHz,  $\text{CDCl}_3$ )<sup>#</sup> 1.19 (1.5H, d,  $J$  6.2 Hz, ((*E*)-Me<sup>‡</sup> and (*Z*)-Me<sup>‡</sup>), 1.30 (1.5H, d,  $J$  6.2 Hz, ((*E*)-Me<sup>°</sup> and (*Z*)-Me<sup>°</sup>), 1.40-1.52 (2H, m, H6'), 1.69-1.81 (3H, m, H3'', H8''A), 1.83-1.91 (1H, m, H8''B), 1.95-2.17 (6H, m, H1', H4'', H9''), 2.27-2.48 (4H, m, (*E*)-H2' and (*Z*)-H2', (*E*)-H5' and (*Z*)-H5'), 3.89 (3H, s, OMe), 3.89-3.99 (2H, m, H7''), 3.95 (3H, s, OMe), 4.01-4.10 (1H, m, H2''<sup>°</sup>), 4.13-4.20 (1H, m, H2''<sup>‡</sup>), 5.28, 5.35 (each 1H, each dd,  $J$  8.5, 3.1 Hz, H3), 5.50-5.62 (2H, m, (*E*)-H3' and (*Z*)-H3', (*E*)-H4' and (*Z*)-H4'), 6.40-6.42 (1H, m, H6), 6.42-6.43 (1H, m, H4);  $\delta_{\text{C}}$  (75.5 MHz,  $\text{CDCl}_3$ )<sup>#</sup> 21.1 ( $\text{CH}_3$ , Me<sup>‡</sup>), 23.1 ( $\text{CH}_3$ , Me<sup>°</sup>), 24.0 ( $\text{CH}_2$ , (*Z*)-C2'), 24.1 ( $\text{CH}_2$ , (*Z*)-C5'), 29.7 ( $\text{CH}_3$ , (*E*)-C2'), 30.2 ( $\text{CH}_2$ , (*E*)-C5'), 30.2 ( $\text{CH}_2$ , C8''<sup>‡</sup>), 30.5 ( $\text{CH}_2$ , C8''<sup>°</sup>), 32.2 ( $\text{CH}_2$ , C3''<sup>‡</sup>), 32.6 ( $\text{CH}_2$ , C3''<sup>°</sup>), 34.6, 34.7 ( $\text{CH}_2$ , C1'), 35.5

<sup>#</sup> The symbol <sup>‡</sup> is used to denote the (3'E, 3S, 2''S, 5''R, 7''S) and (3'Z, 3S, 2''S, 5''R, 7''S) isomers. The symbol <sup>°</sup> is used to denote the (3'E, 3S, 2''S, 5''S, 7''S) and (3'Z, 3S, 2''S, 5''S, 7''S) isomers.

(CH<sub>2</sub>, C4<sup>†</sup>), 35.6 (CH<sub>2</sub>, C9<sup>†</sup>), 36.0 (CH<sub>2</sub>, C4<sup>°</sup>), 36.4 (CH<sub>2</sub>, C9<sup>°</sup>), 38.9 (CH<sub>2</sub>, C6'), 55.9 (CH<sub>3</sub>, OMe), 56.0 (CH<sub>3</sub>, OMe), 74.1, 75.9, 76.0 (CH, C2''), 77.2, 78.5, 78.6 (CH, C7''), 79.2 (CH, C3), 97.4 (CH, C6), 98.9 (CH, C4), 106.8 (quat, C7a), 114.4 (quat, C5<sup>°</sup>), 114.9 (quat, C5<sup>†</sup>), 123.4, 123.6 (CH, C3'), 126.1, 126.3 (CH, C4'), 154.7 (quat, C3a), 159.7 (quat, C7), 166.7 (quat, C5), 166.8 (quat, C1); *m/z* (EI+) (MH<sup>+</sup>, 96%), 399 (38), 305 (12), 219 (7), 193 (12), 154 (100), 85 (9); HRMS (EI+): Found M<sup>+</sup>, 416.2183, C<sub>24</sub>H<sub>32</sub>O<sub>6</sub> requires 416.2193.

**(3*S*, 2''*S*, 5''*S*, 7''*S*)- and (3*S*, 2''*S*, 5''*R*, 7''*S*)-5,7-Dimethoxy-3-[6'-(2''-methyl-1'',6''-dioxaspiro[4.4]non-7''-yl)hex-1'-yl]-3*H*-isobenzofuran-1-one (1a) and (2a)**

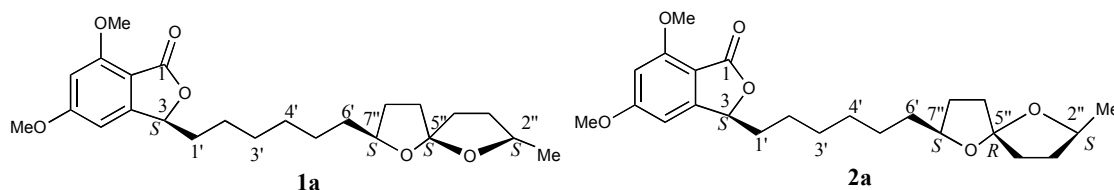

To a solution of the above alkenes (2 mg, 0.01 mmol) in tetrahydrofuran:methanol (1:1, 2.0 mL) was added potassium carbonate (2 mg, 0.01 mmol) and platinum(IV) oxide (1 mg, catalytic) and the mixture stirred under a hydrogen atmosphere for 4 h. The mixture was filtered through a pad of silica and Celite<sup>®</sup> and the solvent removed under reduced pressure. The clear oil was purified by flash column chromatography using dichloromethane-acetone (99:1-95:5) as eluent to afford the *title compounds* **1a** and **2a** (1.7 mg, 85%) as a clear colourless oil and as a 1:1 mixture of diastereomers;  $\nu_{\max}$  (film)/cm<sup>-1</sup> 2929, 2856, 1755, 1614, 1462, 1337, 1217, 1158, 1104, 1030, 918, 837, 731, 690;  $\delta_{\text{H}}$  (400 MHz, CDCl<sub>3</sub>)<sup>#</sup> 1.20 (1.5H, d, *J* 6.2 Hz, Me<sup>†</sup>), 1.28 (1.5H, d, *J* 6.2 Hz, Me<sup>°</sup>), 1.25-1.35 (4H, m, H3', H5'), 1.39-1.49 (4H, m, H2', H4'), 1.61-1.73 (3H, m, H6', H8''A), 1.83-1.91 (1H, m, H8''B), 1.92-1.97 (2H, m, H3''), 2.00-2.07 (4H, m, H4'', H9''), 2.09-2.14 (2H, m, H1'), 3.89 (3H, s, OMe), 3.90-3.92 (0.5H, m, H7''<sup>°</sup>), 3.94 (3H, s, OMe), 3.99-4.04 (0.5H, m, H7''<sup>†</sup>), 4.07-4.12 (0.5H, m, H2''<sup>°</sup>), 4.16-4.23 (0.5H, m, H2''<sup>†</sup>), 5.29 (1H, dd, *J* 8.2, 3.6 Hz, H3), 6.40 (1H, d, *J* 1.7 Hz, H6), 6.41 (1H, d, *J* 1.7 Hz, H4);  $\delta_{\text{C}}$  (100 MHz, CDCl<sub>3</sub>)<sup>#</sup> 21.1 (CH<sub>3</sub>, Me<sup>†</sup>), 23.0 (CH<sub>3</sub>, Me<sup>°</sup>), 24.6 (CH<sub>2</sub>, C2'), 25.7, 25.9 (CH<sub>2</sub>,

<sup>#</sup> The symbol <sup>†</sup> is used to denote the (3*S*, 2''*S*, 5''*R*, 7''*S*) isomer.  
The symbol <sup>°</sup> is used to denote the (3*S*, 2''*S*, 5''*S*, 7''*S*) isomer.

C5'), 29.3, 29.4 (CH<sub>2</sub>, C3'), 29.7 (CH<sub>2</sub>, C4'), 30.2 (CH<sub>2</sub>, C8''<sup>‡</sup>), 30.7 (CH<sub>2</sub>, C8''<sup>0</sup>), 32.2 (CH<sub>2</sub>, C3''<sup>‡</sup>), 32.6 (CH<sub>2</sub>, C3''<sup>0</sup>), 34.8 (CH<sub>2</sub>, C1'), 35.6 (CH<sub>2</sub>, C6''<sup>‡</sup>), 35.7 (CH<sub>2</sub>, C4''<sup>‡</sup>), 36.1 (CH<sub>2</sub>, C4''<sup>0</sup>), 36.5 (CH<sub>2</sub>, C9''), 37.3 (CH<sub>2</sub>, C6''<sup>0</sup>), 55.9 (CH<sub>3</sub>, OMe), 56.0 (CH<sub>3</sub>, OMe), 74.0 (CH, C2''<sup>‡</sup>), 75.8 (CH, C2''<sup>0</sup>), 78.1 (CH, C7''<sup>‡</sup>), 79.9 (CH, C7''<sup>0</sup>), 79.9 (CH, C3), 97.3 (CH, C6), 98.6 (CH, C4), 106.9 (quat, C7a), 114.3 (quat, C5''<sup>0</sup>), 114.7 (quat, C5''<sup>‡</sup>), 155.2 (quat, C3a), 159.6 (quat, C7), 166.6 (quat, C5), 168.6 (quat, C1); *m/z* (EI<sup>+</sup>) 418 (M<sup>+</sup>, 3%), 361 (26), 320 (24), 278 (9), 207 (16), 193 (35), 141 (100), 112 (13), 85 (24), 55 (9); HRMS (EI<sup>+</sup>): Found MH<sup>+</sup>, 418.2340, C<sub>24</sub>H<sub>35</sub>O<sub>6</sub> requires 418.2355.

**(3'E, 3R, 2''S, 5''S, 7''S)- (3'E, 3R, 2''S, 5''R, 7''S)- (3'Z, 3R, 2''S, 5''S, 7''S)- (3'Z, 3R, 2''S, 5''R, 7''S)- 5,7-Dimethoxy-3-[6'-(2''-methyl-1'',6''-dioxaspiro[4.4]non-7''-yl)hex-3'-en-1'-yl]-3H-isobenzofuran-1-one [precursors to (1b) and (2b)]**

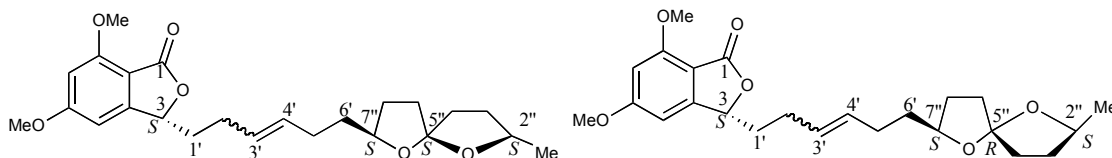

To a solution of sulfones **6** and **7** (70 mg, 0.18 mmol, 1:1) in tetrahydrofuran (2 mL) under an atmosphere of nitrogen at -78 °C was added potassium hexamethyldisilazide (0.46 mL, 0.5M in toluene, 0.23 mmol) and stirred for 20 min. A solution of aldehyde **5b** (45 mg, 0.18 mmol) in tetrahydrofuran (2 mL) was added to the mixture and then stirred at -78 °C for 1 h, before being warmed to rt and stirred for 1 h. Saturated aqueous sodium chloride (10 mL) was added to the mixture, followed by diethyl ether (20 mL), and the layers separated. The aqueous layer was extracted with diethyl ether (2 x 20 mL), and the combined organic extracts were dried over potassium carbonate and the solvent removed under reduced pressure. The crude oil was purified by flash column chromatography using dichloromethane-methanol (99:1), then hexane-diethyl ether (1:1) as eluent to afford the *title compounds* (57 mg, 76%) as a clear colourless oil and as a 1:1 mixture of diastereomers;  $\nu_{\max}$  (film)/cm<sup>-1</sup> 2966, 2932, 2248, 1755, 1613, 1494, 1461, 1338, 1217, 1158, 1056, 1030, 969, 918, 838, 731;  $\delta_{\text{H}}$  (300 MHz, CDCl<sub>3</sub>)<sup>#</sup> 1.18 (1.5H, d, *J* 6.2 Hz, ((*E*)-Me<sup>‡</sup> and (*Z*)-Me<sup>‡</sup>), 1.26 (1.5H, d, *J* 6.2 Hz, ((*E*)-Me<sup>0</sup> and (*Z*)-Me<sup>0</sup>), 1.41-1.49 (2H,

<sup>#</sup> The symbol <sup>‡</sup> is used to denote the (3'E, 3R, 2''S, 5''R, 7''S) and (3'Z, 3R, 2''S, 5''R, 7''S) isomers. The symbol <sup>0</sup> is used to denote the (3'E, 3R, 2''S, 5''S, 7''S) and (3'Z, 3R, 2''S, 5''S, 7''S) isomers.

m, H6'), 1.51-1.65 (1H, m, H8"A), 1.67 (3H, m, H8"B, H3"), 1.94-2.11 (8H, m, H1', H4", H5', H9"), 2.13-2.24 (2H, m, (*E*)-H2' and (*Z*)-H2'), 3.87 (3H, s, OMe), 3.87-3.89 (1H, m, H7"<sup>o</sup>), 3.92 (3H, s, OMe), 3.92-3.98 (1H, m, H7"<sup>‡</sup>), 4.00-4.08 (1H, m, H2"<sup>o</sup>), 4.09-4.21 (1H, m, H2"<sup>‡</sup>), 5.27 (1H, dd, *J* 8.5, 3.3 Hz, H3), 5.35-5.53 (2H, m, (*E*)-H3' and (*Z*)-H3', (*E*)-H4' and (*Z*)-H4'), 6.39 (2H, s, H4, H6);  $\delta_{\text{C}}$  (75.5 MHz, CDCl<sub>3</sub>)<sup>#</sup> 21.1 (CH<sub>3</sub>, Me<sup>‡</sup>), 22.6 (CH<sub>2</sub>, (*Z*)-C2'), 23.0 (CH<sub>3</sub>, Me<sup>o</sup>), 23.6 (CH<sub>2</sub>, (*Z*)-C5'), 27.8 (CH<sub>3</sub>, (*E*)-C2'), 28.8 (CH<sub>2</sub>, (*E*)-C5'), 30.1, 30.3, 30.6, 30.7 (CH<sub>2</sub>, C8"), 32.2 (CH<sub>2</sub>, C3"<sup>‡</sup>), 32.6 (CH<sub>2</sub>, C3"<sup>o</sup>), 34.8 (CH<sub>2</sub>, C1'), 35.4 (CH<sub>2</sub>, C6"<sup>‡</sup>), 35.5 (CH<sub>2</sub>, C4"<sup>‡</sup>), 35.6 (CH<sub>2</sub>, C9"<sup>‡</sup>), 36.0 (CH<sub>2</sub>, C4"<sup>o</sup>), 36.4 (CH<sub>2</sub>, C9"<sup>o</sup>), 37.1 (CH<sub>2</sub>, C6"<sup>o</sup>), 55.9 (CH<sub>3</sub>, OMe), 55.9 (CH<sub>3</sub>, OMe), 74.0 (CH, C2"<sup>‡</sup>), 75.8 (CH, C2"<sup>o</sup>), 77.5 (CH, C7"<sup>‡</sup>), 79.1 (CH, C7"<sup>o</sup>), 79.2 (CH, C3), 97.4 (CH, C6), 98.7 (CH, C4), 106.9 (quat, C7a), 114.3 (quat, C5"<sup>o</sup>), 114.7 (quat, C5"<sup>‡</sup>), 128.2, 128.4 (CH, C3'), 131.5, 131.7 (CH, C4'), 155.1 (quat, C3a), 159.6 (quat, C7), 166.6 (quat, C5), 168.4 (quat, C1); *m/z* (FAB+) (MH<sup>+</sup>, 96%), 399 (38), 305 (12), 219 (7), 193 (12), 154 (100), 85 (9); HRMS (FAB+): Found MH<sup>+</sup>, 417.2268, C<sub>24</sub>H<sub>33</sub>O<sub>6</sub> requires 417.2277.

**(3*R*, 2''*S*, 5''*R*, 7''*S*)- and (3*R*, 2''*S*, 5''*S*, 7''*S*)-5,7-Dimethoxy-3-[6'-(2''-methyl-1'',6''-dioxaspiro[4.4]non-7''-yl)hex-1'-yl]-3*H*-isobenzofuran-1-one (1*b*) and (2*b*)**

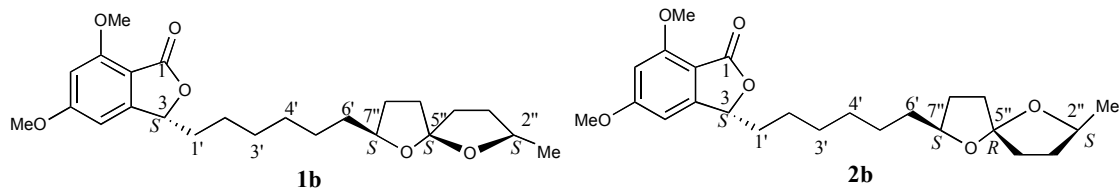

To a solution of the above alkenes (20 mg, 0.48 mmol) in tetrahydrofuran:methanol (1:1, 4 mL) was added potassium carbonate (25 mg, 0.18 mmol) and platinum(IV) oxide (2 mg) and the mixture stirred under an atmosphere of hydrogen for 4 h. The mixture was filtered through a pad of silica and Celite<sup>®</sup> and the solvent removed under reduced pressure to afford the *title compounds* **1b** and **2b** (18 mg, 90%) as a colourless oil and as a 1:1 mixture of diastereomers;  $\nu_{\text{max}}$  (film)/cm<sup>-1</sup> 2931, 2857, 1755, 1613, 1494, 1462, 1337, 1217, 1159, 1054, 1030, 918, 837, 731, 690;  $\delta_{\text{H}}$  (300 MHz, CDCl<sub>3</sub>)<sup>#</sup> 1.19 (1.5H, d,

<sup>#</sup> The symbol <sup>‡</sup> is used to denote the (3*R*, 2''*S*, 5''*R*, 7''*S*) isomer.

Supplementary Material (ESI) for Chemical Communications  
This journal is (c) The Royal Society of Chemistry 2006

$J$  6.2 Hz, Me<sup>‡</sup>), 1.26 (1.5H, d,  $J$  6.2 Hz, Me<sup>°</sup>), 1.23-1.36 (4H, m, H3', H5'), 1.38-1.49 (6H, m, H2', H4', H6'), 1.62-1.72 (2H, m, H1'A, H8"A), 1.88-1.90 (1H, m, H8"B), 1.92-1.97 (2H, m, H3"), 1.99-2.05 (3H, m, H4"A, H9"), 2.09-2.14 (2H, m, H1'B, H4"B), 3.87 (3H, s, OMe), 3.88-3.90 (0.5H, m, H7"<sup>°</sup>), 3.92 (3H, s, OMe), 3.96-4.03 (0.5H, m, H7"<sup>‡</sup>), 4.05-4.08 (0.5H, m, H2"<sup>°</sup>), 4.11-4.21 (0.5H, m, H2"<sup>‡</sup>), 5.26 (1H, dd,  $J$  7.5, 3.8 Hz, H3), 6.38 (1H, s, H6), 6.41 (1H, s, H4);  $\delta_C$  (75.5 MHz, CDCl<sub>3</sub>)<sup>#</sup> 21.1 (CH<sub>3</sub>, Me<sup>‡</sup>), 22.9 (CH<sub>3</sub>, Me<sup>°</sup>), 24.5, 24.6 (CH<sub>2</sub>, C2'), 25.6, 25.9 (CH<sub>2</sub>, C5'), 29.2, 29.4 (CH<sub>2</sub>, C3'), 29.6 (CH<sub>2</sub>, C4'), 30.2 (CH<sub>2</sub>, C8"<sup>‡</sup>), 30.7 (CH<sub>2</sub>, C8"<sup>°</sup>), 32.2 (CH<sub>2</sub>, C3"<sup>‡</sup>), 32.6 (CH<sub>2</sub>, C3"<sup>°</sup>), 34.8 (CH<sub>2</sub>, C1'), 35.6 (CH<sub>2</sub>, C6"<sup>‡</sup>), 35.7 (CH<sub>2</sub>, C4"<sup>‡</sup>), 36.1 (CH<sub>2</sub>, C4"<sup>°</sup>), 36.4 (CH<sub>2</sub>, C9"), 37.3 (CH<sub>2</sub>, C6"<sup>°</sup>), 55.9 (CH<sub>3</sub>, OMe), 55.9 (CH<sub>3</sub>, OMe), 74.0 (CH, C2"<sup>‡</sup>), 75.7 (CH, C2"<sup>°</sup>), 78.0 (CH, C7"<sup>‡</sup>), 79.9 (CH, C7"<sup>°</sup>), 79.9 (CH, C3), 97.4 (CH, C6), 98.6 (CH, C4), 106.9 (quat, C7a), 114.2 (quat, C5"<sup>°</sup>), 114.7 (quat, C5"<sup>‡</sup>), 155.1 (quat, C3a), 159.6 (quat, C7), 166.6 (quat, C5), 168.4 (quat, C1);  $m/z$  (FAB+) 419 (MH<sup>+</sup>, 81%), 361 (5), 320 (6), 207 (7), 193 (10), 154 (100), 120 (12), 111 (11) (9); HRMS (FAB+): Found MH<sup>+</sup>, 419.2446, C<sub>24</sub>H<sub>35</sub>O<sub>6</sub> requires 419.2434.

---

The symbol <sup>°</sup> is used to denote the (3*R*, 2"*S*, 5"*S*, 7"*S*) isomer.
